# Supplementary material for: Silver organosol: synthesis, characterisation and localised surface plasmon resonance study
Source: Royal Society of Chemistry journal article supplement (doi:10.1039/b508730a), 2005-01-01

# Supplementary Material (ESI) for New Journal of Chemistry  
# This journal is © The Royal Society of Chemistry and  
# The Centre National de la Recherche Scientifique, 2005  
Electronic Supplementary Information

Silver organosol : synthesis, characterisation and localised surface plasmon  
resonance study

Sudip Nath, Sujit Kumar Ghosh, Snigdhamayee Praharaj, Sudipa Panigrahi, Soumen Basu  
and Tarasankar Pal\*

Department of Chemistry, Indian Institute of Technology, Kharagpur 721 302, India

Email: tpal@chem.iitkgp.ernet.in

**ESI. TEM image of silver nanoparticles dispersed in THF after one year.**

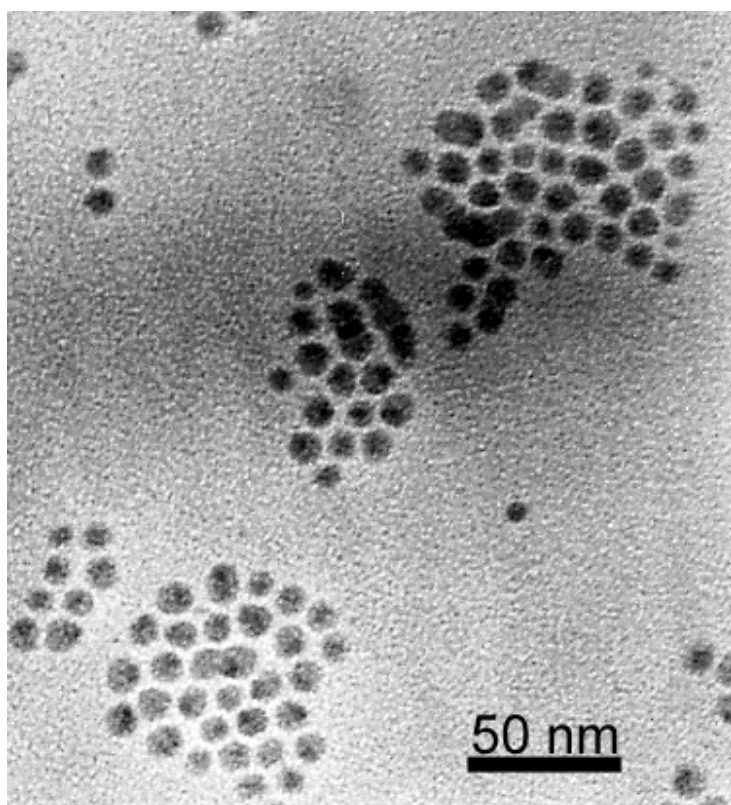

Supplement: b508730a.pdf [file b508730a.pdf]
